1           **Novel ratio-metric features enable the identification of new driver genes across cancer types**

2           Malvika Sudhakar<sup>1,2,3</sup>, Raghunathan Rengaswamy<sup>2,3,4\*</sup>, Karthik Raman<sup>1,2,3\*</sup>

3

4           <sup>1</sup>Department of Biotechnology, Bhupat Jyoti Mehta School of Biosciences

5                           <sup>2</sup>Initiative for Biological Systems Engineering (IBSE)

6           <sup>3</sup>Robert Bosch Centre for Data Science and Artificial Intelligence (RBC-DSAI)

7           <sup>4</sup>Department of Chemical Engineering, Indian Institute of Technology Madras,

8                                           Chennai – 600 036, India

9

10                   \*Corresponding authors: Email: [kraman@iitm.ac.in](mailto:kraman@iitm.ac.in), [raghur@iitm.ac.in](mailto:raghur@iitm.ac.in)

11

12           **ABSTRACT**

13           An emergent area of cancer genomics has been the identification of driver genes. Driver  
14           genes confer a selective growth advantage to the cell and push it towards tumorigenesis.

15           Functionally, driver genes can be divided into two categories, tumour suppressor genes  
16           (TSGs) and oncogenes (OGs), which have distinct mutation type profiles. While several

17           driver genes have been discovered, many remain undiscovered, especially those that are  
18           mutated at a low frequency across samples. The current methods are not sufficient to

19           predict all driver genes because the underlying characteristics of these genes are not yet  
20           well understood. Thus, to predict novel genes, we need to define new features and models

21           that are not biased and identify genes that might otherwise be overshadowed by mutation  
22           profiles of recurrent driver genes. In this study, we define new features and build a model to

23           identify novel driver genes. We overcome overfitting and show that certain mutation types

24 such as nonsense mutations are more important for classification. Some known cancer  
25 driver genes, which are predicted by the model as TSGs with high probability are ARID1A,  
26 TP53, and RB1. In addition to these known genes, potential driver genes predicted are CD36,  
27 ZNF750 and ARHGAP35 as TSGs and TAB3 as an oncogene. Overall, our approach surmounts  
28 the issue of low recall and bias towards genes with high mutation rates and predicts  
29 potential novel driver genes for further experimental screening.

30 **Keywords:** Driver genes, random forest, cancer genomics, tumour suppressor genes,  
31 oncogenes, machine learning

## 32 **BACKGROUND**

33 Cancer is one of the leading causes of morbidity globally, with more than 18.1 million cases  
34 reported in the year 2018 [1]. A major focus of cancer research has been the understanding  
35 of molecular mechanisms that govern tumorigenesis and the targets that can be used for  
36 treatment. Cancer cells are distinct because of their genomes, which give these cells the  
37 ability to divide and metastasize to other tissues in the body. It has been observed that  
38 mutations in some genes [2, 3] confer the ability of oncogenesis to these cells. The term  
39 “driver” was coined to refer to mutations in the genome that pushed the cell to oncogenesis  
40 [4]. Of all the mutations present in a cancer cell, not all are involved in giving a cellular  
41 advantage to the cell to divide uncontrollably. Driver mutations [4, 5] are those that were  
42 advantageous for tumour development and metastasis during the clonal evolution [6, 7]. On  
43 the other hand, *passenger* mutations [4, 5] are mutations that are accumulated during  
44 normal cell division or due to high mutational rates in cancer cells, but their presence or  
45 absence does not affect the progression and establishment of tumours.

46 Driver genes are effectively those genes that harbour mutations that provide them with a  
47 selective advantage to divide and grow unchecked. These driver genes not only help the  
48 cells bypass the cell cycle checkpoints to divide in an uncontrolled fashion but also give  
49 added functionality, such as bypassing the immune system [8, 9] and angiogenesis [10, 11],  
50 which lead to their persistence in the body. While certain cancers with well-understood  
51 mechanisms show that the presence of driver mutations is recurrent in most samples of a  
52 cancer type [2], others seem to have mutations that occur at a lower frequency. Driver  
53 genes that contain lower frequency of mutations are difficult to identify [12] because most  
54 likely these genes work in combination with other genes to confer a selective advantage to  
55 the cell.

56 Driver genes can be of two kinds depending on the role of the gene in a normal cell type. A  
57 tumour suppressor genes (TSG), as the name suggests, is the cell's defence mechanism from  
58 becoming a cancer cell. When such a gene loses its function due to say, frameshift  
59 mutations or nonsense mutations, a selective growth advantage is conferred to the cell.  
60 Proto-oncogenes undergo gain of function mutations to become into an oncogene (OG).  
61 Mutations in both TSGs and OGs tip the balance of a normal cell into becoming a cancer cell.  
62 While many TSGs and OGs have been discovered for different cancer types, most of them  
63 are highly potent and recurring in different patients. A pan-cancer model will help in  
64 identifying patterns which might be lost while studying a cohort or specific cancer type,  
65 owing to low sample sizes or mutation frequencies. A key aim of this study is to find low-  
66 frequency driver genes by classifying them into TSGs and OGs.

67 There are broadly two classes of methods for identifying driver genes based on mutational  
68 data. The first class of methods [13–15] rely on the rate of mutations in genes for a set of

69 patients, to identify driver genes. In these studies, the background mutation rate is  
70 estimated, and genes that show statistically different mutation rates are identified as driver  
71 genes. The rate of different types of mutations is used to calculate the background mutation  
72 rate [14, 15]. The methods of identification differ in the statistical method used [14]. The  
73 rate of cell division and length of the gene needs to be taken into account as the mutation  
74 rate may change depending on cell type and length and position of the genes [15].

75 Among the different methods that exist for identifying driver genes, when validated using  
76 the Cancer Gene Census (CGC) [16], it was observed that while the precision of identifying  
77 these genes was high, they had a very low recall [12]. Furthermore, genes identified through  
78 these approaches have a high recurrence of being mutated across different tumour  
79 samples. We now know that the rate of mutation is not sufficient for the identification of  
80 driver genes; instead, genes with low mutation rate can be driver genes if a mutation occurs  
81 at functionally important positions.

82 The second class of methods use a ratio-metric approach, where not only the repeated  
83 occurrence of mutations is taken into consideration, but also the functional impact of the  
84 mutations. Ratio-metric algorithms [17–19] capture the proportion at which the different  
85 mutation types occur. The type of mutations and their ratios vary and are distinct for TSGs  
86 and OGs. For instance, TSGs are more likely to have indels (insertions and deletions), more  
87 specifically frameshift mutations, that lead to loss of function of the protein. On the other  
88 hand, OGs tend to accumulate missense mutations that confer the protein with a “gain of  
89 function” [5, 20]. These features are then used for differentiating between these two types  
90 of driver genes.

91 While these methods do capture some mutation patterns observed across samples, low  
92 recall shows that our understanding of the characteristics that define TSGs and OGs is far  
93 from complete. In this study, we define new features that calculate entropy and frequency  
94 of different mutation types along with other ratio-metric features. Our aim is to identify  
95 important features for TSGs and OGs that can help classify a given gene as a TSG or an OG.  
96 Since the ratio-metric approach is based on the type of mutations and these differ for TSGs  
97 and OGs, genes were classified into two classes. Further, classification problems are prone  
98 to overfitting resulting in high classification scores in the training set, but the model can turn  
99 out to be unreliable for predictions using new data. We outline a method for estimating  
100 parameters for the given classification algorithm and avoid overfitting. We use the final  
101 model to predict novel driver genes by classifying a list of unlabelled genes; we validated  
102 our predictions by illustrating the presence of known TSGs and OGs among our predictions  
103 and through functional analysis of the predicted novel genes. We calculated the mutation  
104 rates and compared our results with the widely used tool MutSigCV and show that our  
105 method is able to pick out many driver genes that have very low mutation rates. Further, we  
106 used a pan-cancer model to predict driver genes that were tissue-specific.

## 107 **RESULTS**

108 We define novel features and a method to estimate parameters and build a classifier using  
109 pan-cancer data to predict TSGs and OGs. The classifier is further used to predict labels for  
110 unlabelled genes, at pan-cancer and tissue-specific levels, which are analysed for functional  
111 enrichment.

## 112 **Novel features used for classification of TSGs and OGs**

113 We trained multiple random forest models using a subset (80%) of 136 TSGs and 76 OGs for  
114 each fold of the cross-validation. We performed a five-fold cross-validation while estimating  
115 hyper-parameters for the model followed by multiple random iterations to estimate stable  
116 hyper-parameters and avoid overfitting (as defined in Methods). It is important to carefully  
117 consider overfitting as the initial training set is not very large. The accuracy for the test set  
118 reduces compared to the training set, but this difference is not substantial. We note that  
119 TSGs can be predicted with higher accuracy than OGs; it is probable that the features are  
120 biased at capturing information regarding TSGs better than OGs. Across the multiple  
121 models, an average accuracy of  $0.76 \pm 0.03$  was achieved. These models were further used  
122 for the identification of novel genes as well as tissue-specific analyses. Our model presents a  
123 significant improvement in recall for TSGs. For OGs, the recall is similar to those observed in  
124 other tools. Nevertheless, an average recall of driver genes (comprising both classes) shows  
125 an improvement over the tools reported earlier [12].

126 To identify features important for the classification of TSGs and OGs, we calculated the  
127 average rank of each feature, across all models. We observe that the top-ranking features  
128 contain LOF and missense mutations (Supplementary Table S1). The new features that  
129 replace old features in the top 18 ranks are Nonsense entropy, High missense frequency,  
130 Compound/benign, High Frameshift Frequency, Damaging/kb, Compound/kB,  
131 Damaging/LoFI and HiFI/benign. Further, we used the training set genes to compare the  
132 distribution of feature values in TSG and OGs, and observed that our top-ranking features  
133 show the highest differences between the two distributions (Fig 1). While it is common

134 knowledge that LOF mutations accumulate in TSG and recurrent missense mutations in OGs,  
135 we formally show that the feature distribution is different for these two functional classes.

### 136 **Iterative hyper-parameter estimation avoids overfitting**

137 Initial analysis for a large number of  $n\_estimator$  for random forest and using  
138 `BalancedBagging` to manage class imbalance gave higher accuracy score for training sets  
139 comparable to Davoli *et al.*, (2013). However, these showed very low accuracy for the test  
140 set (Table 2), indicating overfitting. Additionally, we observed that changing the random  
141 seed showed substantial variation in results. This variation is unexpected and could perhaps  
142 stem from non-optimum parameters used for classification or the small size of the data. To  
143 avoid this variation, we re-estimated the random forest parameters,  $n\_estimator$ ,  
144  $max\_features$ ,  $max\_depth$  and  $criterion$ . Changing the  $n\_estimator$  had a major effect on  
145 classification, and grid search with cross-validation did not help in removing overfitting.

146 We overcame this by multiple iterations of hyper-parameter estimation by changing the  
147 random seed, which helps us identify more stable hyper-parameters. This gave lower  
148 accuracy for training sets but improved the accuracy of the test set considerably. When  
149 varying sets of random seeds (10, 20, 40, 80, 160, 320) were used, the results were  
150 consistent across all cross-validation folds (test set accuracy 0.76 and standard deviation  
151 0.03) implying the increasing number of random seed iterations do not decrease or improve  
152 accuracy. We observe that for a given data fold, the hyper-parameters selected are more  
153 stable for varying sets of random seeds. While different parameter sets dominate as the  
154 data is changed, the overall results on the test set do not vary.

## 155 **Model identified novel TSGs and OGs along with known driver genes**

156 All genes that were not used for training the models were classified into TSGs and OGs. This  
157 list also contained genes that are known driver genes present in CGC but not used for  
158 training. The labels were predicted for the unlabelled genes, of which 126 genes or  
159 transcripts showed consensus across all models. CGC known driver genes contributed to  
160 40.5% of these predictions which included genes such as ARID1A, ATRX, NF1, TP53, RB1, and  
161 STAG1 and their transcripts. Some novel genes predicted consistently are SIN3A, ZNF750,  
162 IWS1, CD36, ARHGAP35, MGA, and RASA1 as TSGs. The model tends to be biased towards  
163 TSGs with 699 genes with consistent predictions for 3 or more models out of which only 9  
164 are predicted as OGs. The top OGs predicted are U2AF1, BCL2L10, KRAS, MAP1LC3B,  
165 C11orf68, TAB3, MED12, MAX, and BRAF. Further, we show not all transcripts of a gene  
166 behave like a driver gene, for e.g. ATRX transcript ENST00000373344 is labelled as TSG but  
167 not ENST00000400866, ENST00000373341. The presence of known driver genes among top  
168 TSG and OG shows the validity of the model and those other genes in the list are potential  
169 driver genes.

170 Enrichment analysis of genes for various KEGG and BIOCARTA pathways revealed genes  
171 involved in different cancer pathways such as myeloid leukaemia, and pancreatic cancer.  
172 Genes are also enriched for various signalling pathways associated with cell growth, such as  
173 EGF and PDGF signalling pathways. Further, to validate, a similar analysis was conducted  
174 using genes used for training the model. We find GO terms related to cell cycle, regulation  
175 of transcription, signalling and cell cycle arrest to be common for both results. These  
176 keywords were further clustered with top clusters associated with genes involved in zinc-



177 finger proteins, helicases, ATP-binding, ARID binding and cancer pathways. The analysis  
178 shows known driver genes and predicted driver genes enrich for similar pathways.

### 179 **Our approach identifies genes with low mutation frequency**

180 We analysed the mutation frequencies of the predicted genes. Mutation rates were  
181 calculated using MutSigCV, a well-known driver gene predictor, which calculates mutation  
182 rates to identify driver genes. MutSigCV ranks all genes of which a total of 602 driver genes  
183 were identified above the threshold ( $p \leq 0.005$ ,  $q \leq 0.01$ ). Training data labels were used  
184 to compare the two methods. MutSigCV identified 40% for our training gene set with 85  
185 genes predicted as driver, while our model did better by predicting 85% of genes. The  
186 mutation rates of the genes predicted by the two models were compared. Since MutSigCV  
187 ranks all genes, we picked top genes equal in size to our model predictions ( $\geq 5$  model  
188 consensus) and calculated KS statistic against training set and plotted the fraction of genes  
189 below mutation rate of each gene. We observe that distribution of mutation rates is similar  
190 to training set for our predicted genes, while MutSigCV tends to be biased towards genes  
191 with higher mutation rates (Fig 2). The minimum mutation rate predicted for our model was  
192 0.35 while for MutSigCV was 0.90. The KS (Kolmogorov-Smirnov) statistic for both models  
193 when compared to training set shows the difference is far lesser for our model when  
194 compared to MutSigCV (Table 4), which shows that the distribution of mutation rates is  
195 similar to what is expected.

### 196 **Driver genes are tissue-specific**

197 Cohort studies tend to be specific to a cancer type. The usefulness of a pan-cancer model is  
198 further elucidated when it can be used to identify tissue-specific driver genes. The objective  
199 of predicting genes using a subset of data specific to tumour primary tissue source was to

200 identify genes specific to a cancer type. This helped in identifying genes which might  
201 otherwise be lost in biological noise (Table 5). We observe TP53 predicted as TSG across the  
202 different tissues. Other known driver genes that weren't identified by the pan-cancer  
203 analysis were identified such as CFBF, CDH1, PTEN in breast cancer and APOB in liver. Genes  
204 such FAM182A, SOX9, AHNAK2, ENSG00000121031, FLT3LG, PMEPA1, ZFP36L2 in the large  
205 intestine, ALB, KRTAP19-1, APOB, CD200, CRYGD, KRTAP24-1, OR6N2 in the liver are novel  
206 predictions, and their functions in these cancers can further be studied. We used the pan-  
207 cancer models to predict tissue-specific driver genes and identified new genes not reported  
208 by the pan-cancer analysis.

209 Genes identified for breast cancer was validated by supporting literature. CFBF [21] and  
210 PTEN [22, 23] is a known TSG in breast cancer. PTEN is found to be under-expressed in  
211 breast cancer [24, 25]. While CDH1 mutations are found mostly in stomach cancer, they are  
212 also shown to be frequently occurring in lobular breast cancer [26, 27]. Pathway analysis of  
213 breast cancer genes shows enrichment of pathways involved in gene expression regulation  
214 governed by TP53, RUNX1 and PTEN which includes pathways that regulates estrogen-  
215 mediated transcription. CFBF deletion leads to expression loss of RUNX1[21], which can no  
216 longer regulate NOTCH signalling by repression, which is confirmed by pathway analysis.  
217 Some apoptosis pathways are enriched that include CDH1 and TP53 genes. The genes  
218 identified by the pan-cancer model for breast cancer samples identify genes functionally  
219 important in breast tumour cells.

220 Predictions made for liver cancer were mostly novel, which made literature validation  
221 difficult. RNA expression levels of genes APOB, ALB and CD200 were higher compared to all  
222 other tissues (as reported by The Human Protein Atlas). Higher albumin levels are known to

223 decrease the risk of HCC (Hepatocellular carcinoma) [28]. APOB mutational signatures are  
224 shown computationally to be significant to predict prognosis, by loss of regulation of genes  
225 such as TP53, PTEN, HGF [29]. While role of other genes is difficult to elucidate, our method  
226 helps identify research gaps which can be filled by studying these potential driver genes.

## 227 **DISCUSSION**

228 Identification of driver genes has been an important focus area of cancer research because  
229 these genes are potential targets for therapy and biomarkers. Different approaches have  
230 been used for identification using mutational information [17, 18, 30], gene expression  
231 levels [31], protein structural information [32], network analysis [33, 34] or using multiple  
232 data sources [31]. Advances in sequencing technologies have made mutational information  
233 easily available, and different tools have been developed to identify driver genes. Driver  
234 genes are further classified into TSGs and OGs based on the functional impact of the  
235 mutations they harbour.

236 We adopt a classification approach that is able to predict TSGs and OGs by leveraging a set  
237 of ratio-metric and other new features. Traditional methods identify genes based on the  
238 mutation rate. Compared to previous approaches, we ascribe a higher significance to  
239 functional impact along with the position of the mutations, as the genes might contain  
240 mutations in functionally important regions even though the mutation rate may not be very  
241 different from the background mutation rate. Features like nonsense entropy, frameshift  
242 frequency captures the recurrence of a mutation when multiple samples are considered,  
243 thus taking into account the position at which the mutation occurs.

244 For classification, many different algorithms are available, but the performance of the  
245 algorithm is dependent on the data and estimation of parameters. It is especially important

246 while solving biological problems, where the training data might be small, to build robust  
247 models. We tried the classification of genes using support vector machines (SVM), logistic  
248 regression, balanced bagging as well as random forest and found that random forest  
249 performed better in this case. Further, high performance on a given data might also be due  
250 to overfitting. We sought to avoid overfitting by performing a standard 5-fold cross-  
251 validation while estimating random forest parameters as well as multiple iterations for  
252 estimation of stable parameters. We developed a procedure to verify that the predictions  
253 are reasonably stable. An ensemble of models is used to make final predictions.

254 It is important that the estimated parameters are robust to changes in data. For random  
255 forest, we estimated four parameters out of which  $n\_estimator$  seemed to have a large  
256 effect on the classification. For large values of  $n\_estimator$ , we were able to show high  
257 accuracy scores similar to Davoli et al., (2013) but the accuracy scores for test set were  
258 much lower. We were not able to compare our performance on the test set with that of  
259 Davoli *et al* (2013), as their test set results have not been published. To build a better model  
260 that is not biased to data, we needed a more robust classifier, that is sufficiently generalized  
261 and not dependent on the training data.

262 The models generated were used to find which of the new features are important for  
263 classification. To evaluate the model, we used 5-fold cross-validation with 20% test dataset  
264 while maintaining the ratio between TSGs and OGs and calculated metrics such as accuracy  
265 and F1 score. Instead of AUROC (Area under Receiver Operating Characteristic), we chose to  
266 show accuracy and F1 score, as AUROC only helps in estimating if the model can separate  
267 the given classes but tells us very little about the classification power for each of these  
268 classes. The F1 score is calculated for each of the given classes and helps understand if the

269 model is biased towards any one of the classes. The accuracy score on the test set shows  
270 that mere accuracy is not sufficient for judging a model. The models perform slightly better  
271 for TSGs, though it is far poorer at classifying OGs.

272 While assessing the model, it is important to use metrics such as F1 score, as it scores  
273 predictions for each of the classes. Studies reporting only AUROC statistics present an  
274 incomplete picture and are not effective in estimating the performance of the model,  
275 especially in datasets having a class imbalance [35]. This is evident when we compare  
276 AUROC of Balanced bagging model ( $0.76 \pm 0.07$ ) with our model ( $0.54 \pm 0.07$ ). AUROC gives  
277 measures the models ability to separate the classes and not the prediction power. By  
278 reporting both accuracy as well as F1 score, we show that the model does not perform  
279 equally for both classes but tends to be better at classifying TSG than OG. This indicates that  
280 the chosen features are not sufficient to classify oncogenes.

281 Feature ranking shows that features containing information about LOF, nonsense,  
282 frameshift and missense mutations are important. Nonsense and frameshift mutations are  
283 frequently seen in TSGs while recurrent missense mutations are characteristic of OGs as  
284 they lead to “gain of function”.

285 The list of genes classified contained known driver genes and other transcript data for genes  
286 present in training and test set. We found that TSGs such as ATRX, PTCH1, and STAG2 were  
287 classified as TSGs with high probability. KDM6A gene and its transcripts (ENST00000377967,  
288 ENST00000382899) feature among the top, which shows that the model can also help  
289 classify a particular transcript of a gene. Similarly, TP53 and its six transcripts were all  
290 classified as TSGs. Genes U2AF1, KRAS, BRAF, MED12 and MAX were classified as OGs

291 among the top genes identified as OGs. As the probability scores for OGs tend to be lesser  
292 than TSGs, relatively fewer OGs make the cut-off for the top 5 percentile.

293 Among the top TSGs identified, CD36 (previously known as FAT) is receptor protein for fatty  
294 acids. CD36 is also a prognostic marker for different cancer types [36, 37] and found in  
295 metastatic cells [36, 38]. While the expression of a gene is markedly different from normal  
296 cells, the molecular mechanism that enables metastasis is not well understood. Another  
297 gene, ARHGAP35, is a glucocorticoid receptor DNA binding factor, which has also been  
298 previously identified as a potential driver gene by other methods [39, 40]. ZNF750, zinc  
299 finger protein 750 has been established as a tumour suppressor in oesophageal squamous  
300 cell carcinoma [41–43] though it is absent from the CGC driver gene list. Some other  
301 potential TSGs not present in the CGC list are MBD6 and RASA1. In the human protein atlas,  
302 MAP1LC3B is labelled as a prognostic marker for renal and stomach cancer among the three  
303 shortlisted OGs.

304 Our model does have some limitations. We have used binary classification for identification  
305 of TSGs and OGs which, classifies all genes as either TSG or OG. All genes containing  
306 mutations are not driver genes, and thus, a majority of genes are neutral. We overcome this  
307 by taking consensus across the five models built. It may be possible to improve on this  
308 classification by solving a multi-class problem where each gene is identified as TSG, an OG or  
309 neutral gene. The difficulty in this problem stems from the huge class imbalance in the data  
310 as well as the definition of neutral genes. While there are studies showing the importance of  
311 a gene in tumour evolution, it is difficult to define genes that are not involved in cancer  
312 progression. Most methods use a list of genes that do not contain cancer driver genes and  
313 genes involved in cancer pathways, but this does not exclude potential driver genes.

314 Additionally, it has been seen that mutations are not always the reason for the change in  
315 functionality and regulation might also lead to change in expression at transcriptomic and  
316 proteomic levels. Other than adding new features to the analysis, including transcriptomic  
317 and proteomic data along with genomic mutation data might further improve the  
318 classification of genes.

## 319 **CONCLUSION**

320 In summary, we see two main contributions of our paper. First, we developed a classifier,  
321 which enabled an improved recall of TSGs and OGs compared to previously proposed  
322 methods in the literature. We carefully avoided overfitting for achieving consistent and high  
323 confidence results. Second, we predicted many potential TSGs and OGs at both the pan-  
324 cancer and tissue-specific level, which form a ready short-list for further experimental  
325 investigation. Some of the top predictions were already well-known cancer drivers while  
326 others are reported in multiple cancer studies though their role in tumorigenesis is not yet  
327 well understood. Our approach is also readily amenable to the integration of other omic  
328 datasets, as they become available.

## 329 **METHODS**

### 330 **Data**

331 We downloaded somatic mutation data from Catalogue of Somatic Mutations in Cancer  
332 (COSMIC) (v79) [44]. These data were pre-processed to exclude hyper-mutated samples  
333 (samples containing more than 2000 mutations) Known SNPs were retained only if they  
334 were “confirmed somatic mutations”. The final processed data consist of 2,145,044  
335 mutations from 20,667 samples across 37 primary tissues. COSMIC also contains transcript

336 information, where different transcripts of a gene are saved as “gene\_transcript” and are  
337 handled as separate genes. Splice site mutations were identified as mutations at 1 or 2 bps  
338 after the end of the exon border or 1 or 2 bps before the start of exon border. We used the  
339 popular tool Polyphen2 [45] to predict the phenotypic impact of missense mutations. For  
340 some mutations, Polyphen2 returns multiple scores, which we averaged for the purpose of  
341 our analyses.

342 TSGs and OGs for training and test were taken from the CGC [16] gene list. Only those genes  
343 that were labelled “TSG” or “OG” and not “Fusion” were used for this analysis. A total of 213  
344 driver genes were used, of which 136 were TSGs and 77 were OGs. The TSG:OG ratio was  
345 maintained during all cross-validation steps and in both training and test sets.

#### 346 **Ratio-metric features**

347 Mutations were divided into 11 different categories [17, 45]: silent, missense, splicing, High  
348 Functional Impact (HiFI), Mid Functional Impact (MiFI), Low Functional Impact (LoFI),  
349 nonsense, frameshift, in-frame, nonstop or complex. Not all missense mutations are equally  
350 deleterious — labelling them into HiFI, MiFI and LoFI categories helps differentiate genes  
351 that have a large number of mutations with low impact, from genes that have relatively  
352 fewer mutations but with larger functional impact. We use PolyPhen2 scores to categorise  
353 mutations as HiFI ( $\geq 0.85$ ), LoFI ( $\leq 0.15$ ) and MiFI (between 0.15 and 0.85), to differentiate  
354 between high confidence pathogenic mutation predictions.

355 Additionally, other mutation categories were defined, which clubbed multiple mutations  
356 into one, such as ‘compound’ and ‘damaging’. Compound mutations are included because  
357 mutations types such as in-frame, nonsense and complex occur at a lower frequency than  
358 single nucleotide missense mutations, which might lead to patterns and impact of these



359 mutations to be masked. Since the functional impact is similar to missense mutations,  
360 combining similar mutation types might help in capturing information of these less  
361 frequently observed mutation types. Loss of function (LOF) mutations introduce large  
362 changes into proteins, causing disruption of function. Damaging mutations are the sum of  
363 HiFI and MiFI mutations; these capture impact of multiple MiFI and sparse HiFI mutations.  
364 Many features compute a ratio of mutation types, as outlined in Table 6. We defined 37  
365 features in all, with 18 of them being similar to those defined as Davoli *et al.*, (2013).

### 366 Entropy and Frequency features

367 Entropy and frequency features were defined for four mutation types. A mutation ( $M_i$ ) in a  
368 given gene  $i$  is represented by its location. For missense mutations,  $M_i$  is represented as a  
369 tuple  $(loc, wt, mt)$  where  $loc$  is the location of the mutation,  $wt$  is the wild type nucleotide,  
370 and  $mt$  is the mutated nucleotide. If  $k$  unique mutations are present in a gene,  $f_i$  gives the  
371 frequency for each of the mutations.

$$f_i = \frac{n_M}{n}$$

372 where  $n_M$  is the number of occurrences of mutation  $M$  and  $n$  is the number of mutations in  
373 gene  $i$ .

$$S = \sum_{i=1}^k f_i \log f_i$$

$$Entropy = \log k - S$$

### 374 Classification of genes

375 Different machine learning algorithms such as random forest, support vector machines and  
376 logistic regression were used, among which random forest gave the highest accuracy.

377 Random forest was used for building a robust model and classifying TSGs and OGs. We used  
378 five-fold cross-validation to split data into training to test set ratio of 8:2; where each fold  
379 acts as a test set. We used the implementation of Random forest from the Python package  
380 Sci-Kit Learn [46]. We tuned the parameters using a five-fold cross-validation grid search  
381 along with multiple random iterations of random seed (described later). The parameters  
382 tuned are *n\_estimator* (from 5-40), *max\_features* ('sqrt' or 'log2'), *max\_depth* (2-4) and  
383 *criterion* ('gini' or 'entropy'). The number of maximum features each decision tree considers  
384 is given by the parameter *max\_features*, which can be calculated in two ways, as either the  
385 square root or  $\log_2$  of the total number of features.

### 386 **Tuning hyperparameters and estimating the robustness of the classifier**

387 Our initial results showed variation in classification depending on the random seed that was  
388 selected for classifying, even though cross-validation was used while estimating parameters.  
389 We used balanced bagging classifier to take into consideration the class imbalance and  
390 estimated parameters using cross-validation, which is the standard method. Poor results for  
391 this model led us to estimate hyper-parameters differently.

392 To avoid this variation, classification and parameter selection were done for multiple  
393 random seeds (Fig. 3 block B). Grid search with five-fold cross-validation was done for  
394 multiple different random seeds. Optimum parameters were selected by first estimating  
395 parameter '*n\_estimator*' and using it to estimate other parameters. Recurrence of  
396 '*n\_estimator*' across different random seeds was counted, and the maximum count was  
397 considered as the best '*n\_estimator*' to be given to the model. If multiple estimators were  
398 chosen, maximum accuracy during cross-validation was used to select one estimator.  
399 Maximum accuracy was used to find other parameters for the given best '*n\_estimator*'. The

400 classification was rerun using the given parameters, and features were ranked. The model  
401 was used to predict the classification of test set genes.

402 To estimate the effect of the number of random iterations on parameter estimation, the  
403 classifier was built on a varying number of iterations of random seeds (10, 20, 40, 80, 160,  
404 320). The stability of hyper-parameters selected was analysed based on the variation in the  
405 accuracy of the test dataset.

#### 406 **Feature comparison and ranking**

407 All features defined were used for classification and ranked depending on their contribution  
408 to the model. Average rank was calculated across the five validation sets. The features are  
409 given in Table 7.

#### 410 **Identification and functional analysis of novel TSGs and OGs**

411 We used the model built on the combined set of 37 features to classify unlabelled genes  
412 into TSGs and OGs. In total, 26,866 genes were classified as TSGs or OGs and ranked using  
413 their probabilities for each class. The genes given for classification contains different  
414 transcripts of the same gene symbol as different genes. In all, the gene list contained 18,951  
415 unique gene symbols. Genes were labelled TSG and OG depending on their presence in the  
416 top 5 percentile and consensus across models built during cross-validation. Since not all  
417 genes are necessarily TSGs or OGs, genes which didn't fulfil these criteria remained  
418 unlabelled. Novel TSG and OG gene list predicted by greater than four models were further  
419 used for functional analysis to find the major pathways and gene ontologies these genes are  
420 enriched for. Functional analysis was carried out using DAVID [47, 48] for both, the genes  
421 above the threshold as well as training set genes, and the results were compared.

422 Further, the pan-cancer classifier was used to predict genes in different cancer types based  
423 on the primary tissue where the tumour is formed. The data were filtered based on primary  
424 tissue, and the feature matrix was generated for tissues with >1000 samples. The data was  
425 then standardized and run using pan-cancer models described earlier.

426 We compared and calculated mutation rates using MutSigCV. Since the ground truth is not  
427 known for these predicted genes, we compared the genes used for training and calculated  
428 recall of these genes. Since MutSigCV does not classify genes as TSG or OG, the classes  
429 considered were Driver and Passenger. Further, we were interested in looking at the  
430 mutation rate distribution across the genes predicted. Since the distribution of mutation  
431 rates is unknown, we compared the similarity of the distribution of the predicted genes with  
432 the genes used for training (Kolmogorov-Smirnov statistic). Similarly, the similarity was  
433 compared for genes predicted by MutSigCV.

#### 434 **LIST OF ABBREVIATIONS**

435 AUROC: Area under Receiver Operating Characteristic

436 CGC: Cancer Gene Census

437 COSMIC: Catalogue of Somatic Mutations in Cancer

438 GO: Gene ontology

439 HCC: Hepatocellular carcinoma

440 HiFI: High Functional Impact

441 Indels: insertions and deletions

442 KS statistic: Kolmogorov-Simrnov statistic

443 LOF: Loss of function

444 LoFI: Low Functional Impact

445 MiFI: Mid Functional Impact

446 OG: oncogenes

447 TSG: tumour suppressor gene

#### 448 **REFERENCES**

- 449 1. Ferlay J, Colombet M, Soerjomataram I, Mathers C, Parkin DM, Piñeros M, et al.  
450 Estimating the global cancer incidence and mortality in 2018: GLOBOCAN sources and  
451 methods. *International Journal of Cancer*. 2019.
- 452 2. Miki Y, Swensen J, Shattuck-Eidens D, Futreal PA, Harshman K, Tavtigian S, et al. A strong  
453 candidate for the breast and ovarian cancer susceptibility gene BRCA1. *Science*.  
454 1994;266:66–71. doi:10.1126/science.7545954.
- 455 3. Wooster R, Bignell G, Lancaster J, Swift S, Seal S, Mangion J, et al. Identification of the  
456 breast cancer susceptibility gene BRCA2. *Nature*. 1995;378:789–92. doi:10.1038/378789a0.
- 457 4. Stratton M, Campbell P, Futreal P. The cancer genome. *Nature*. 2009;458:719–24.  
458 doi:10.1038/nature07943.The.
- 459 5. Vogelstein B, Papadopoulos N, Velculescu VE, Zhou S, Diaz L a, Kinzler KW. Cancer  
460 Genome Landscapes. *Science (80- )*. 2013;339:1546–58. doi:10.1126/science.1235122.
- 461 6. Greaves M, Maley CC. Clonal evolution in cancer. *Nature*. 2012;481:306–13.  
462 doi:10.1038/nature10762.
- 463 7. Burrell R a, McGranahan N, Bartek J, Swanton C. The causes and consequences of genetic  
464 heterogeneity in cancer evolution. *Nature*. 2013;501:338–45. doi:10.1038/nature12625.

- 465 8. Beishline K, Azizkhan-Clifford J. Sp1 and the “hallmarks of cancer.” FEBS Journal.  
466 2015;282:224–58.
- 467 9. Cavallo F, De Giovanni C, Nanni P, Forni G, Lollini PL. 2011: The immune hallmarks of  
468 cancer. In: Cancer Immunology, Immunotherapy. 2011. p. 319–26.
- 469 10. Shahmarvand N, Nagy A, Shahryari J, Ohgami RS. Mutations in the signal transducer and  
470 activator of transcription family of genes in cancer. Cancer Sci. 2018; December 2017:1–8.
- 471 11. Zhang E, Feng X, Liu F, Zhang P, Liang J, Tang X. Roles of PI3K/Akt and c-Jun signaling  
472 pathways in human papillomavirus type 16 oncoprotein-induced HIF-1alpha, VEGF, and IL-8  
473 expression and in vitro angiogenesis in non-small cell lung cancer cells. PLoS One.  
474 2014;9:e103440.
- 475 12. Hofree M, Carter H, Kreisberg JF, Bandyopadhyay S, Mischel PS, Friend S, et al.  
476 Challenges in identifying cancer genes by analysis of exome sequencing data. Nat Commun.  
477 2016;7 May:12096. doi:10.1038/ncomms12096.
- 478 13. Tamborero D, Gonzalez-Perez A, Lopez-Bigas N. OncodriveCLUST: exploiting the  
479 positional clustering of somatic mutations to identify cancer genes. Bioinformatics.  
480 2013;29:2238–44. doi:10.1093/bioinformatics/btt395.
- 481 14. Dees ND, Zhang Q, Kandoth C, Wendl MC, Schierding W, Koboldt DC, et al. MuSiC:  
482 Identifying mutational significance in cancer genomes. Genome Res. 2012;22:1589–98.
- 483 15. Lawrence MS, Stojanov P, Polak P, Kryukov G V., Cibulskis K, Sivachenko A, et al.  
484 Mutational heterogeneity in cancer and the search for new cancer-associated genes.  
485 Nature. 2013;499:214–8.
- 486 16. Futreal PA, Coin L, Marshall M, Down T, Hubbard T, Wooster R, et al. A census of human  
487 cancer genes. Nat Rev Cancer. 2004;4:177–83. doi:10.1038/nrc1299.

- 488 17. Davoli T, Xu AW, Mengwasser KE, Sack LM, Yoon JC, Park PJ, et al. Cumulative  
489 Haploinsufficiency and Triplosensitivity Drive Aneuploidy Patterns and Shape the Cancer  
490 Genome. *Cell*. 2013;155:948–62. doi:10.1016/j.cell.2013.10.011.
- 491 18. Melloni GE, Ogier AG, de Pretis S, Mazzarella L, Pelizzola M, Pelicci P, et al. DOTS-Finder:  
492 a comprehensive tool for assessing driver genes in cancer genomes. *Genome Med*.  
493 2014;6:44. doi:10.1186/gm563.
- 494 19. Tokheim CJ, Papadopoulos N, Kinzler KW, Vogelstein B, Karchin R. Evaluating the  
495 evaluation of cancer driver genes. *Proc Natl Acad Sci*. 2016;113:14330–5.  
496 doi:10.1073/pnas.1616440113.
- 497 20. Hanahan D, Weinberg RA. The Hallmarks of Cancer. *Cell*. 2000;100:57–70.  
498 doi:10.1016/S0092-8674(00)81683-9.
- 499 21. Malik N, Yan H, Moshkovich N, Palangat M, Yang H, Sanchez V, et al. The transcription  
500 factor CFBFB suppresses breast cancer through orchestrating translation and transcription.  
501 *Nat Commun*. 2019.
- 502 22. Lu Y, Lin YZ, LaPushin R, Cuevas B, Fang X, Yu SX, et al. The PTEN/MMAC1/TEP tumor  
503 suppressor gene decreases cell growth and induces apoptosis and anoikis in breast cancer  
504 cells. *Oncogene*. 1999.
- 505 23. Weng L-P. PTEN coordinates G1 arrest by down-regulating cyclin D1 via its protein  
506 phosphatase activity and up-regulating p27 via its lipid phosphatase activity in a breast  
507 cancer model. *Hum Mol Genet*. 2001.
- 508 24. Li S, Shen Y, Wang M, Yang J, Lv M, Li P, et al. Loss of PTEN expression in breast cancer:  
509 Association with clinicopathological characteristics and prognosis. *Oncotarget*. 2017.
- 510 25. Zhang HY, Liang F, Jia ZL, Song ST, Jiang ZF. PTEN mutation, methylation and expression

- 511 in breast cancer patients. *Oncol Lett.* 2013.
- 512 26. Hansford S, Kaurah P, Li-Chang H, Woo M, Senz J, Pinheiro H, et al. Hereditary diffuse  
513 gastric cancer syndrome: CDH1 mutations and beyond. *JAMA Oncol.* 2015.
- 514 27. Schrader KA, Masciari S, Boyd N, Wiyrick S, Kaurah P, Senz J, et al. Hereditary diffuse  
515 gastric cancer: Association with lobular breast cancer. In: *Familial Cancer.* 2008.
- 516 28. Nojiri S, Joh T. Albumin suppresses human hepatocellular carcinoma proliferation and  
517 the cell cycle. *Int J Mol Sci.* 2014.
- 518 29. Lee G, Jeong YS, Kim DW, Kwak MJ, Koh J, Joo EW, et al. Clinical significance of APOB  
519 inactivation in hepatocellular carcinoma. *Exp Mol Med.* 2018;50:147. doi:10.1038/s12276-  
520 018-0174-2.
- 521 30. Kumar RD, Searleman AC, Swamidass SJ, Griffith OL, Bose R. Statistically identifying  
522 tumor suppressors and oncogenes from pan-cancer genome-sequencing data.  
523 *Bioinformatics.* 2015;31:3561–8.
- 524 31. Sanchez-Garcia F, Villagrasa P, Matsui J, Kotliar D, Castro V, Akavia UD, et al. Integration  
525 of Genomic Data Enables Selective Discovery of Breast Cancer Drivers. *Cell.* 2014;159:1461–  
526 75.
- 527 32. Fujimoto A, Okada Y, Boroevich KA, Tsunoda T, Taniguchi H, Nakagawa H. Systematic  
528 analysis of mutation distribution in three dimensional protein structures identifies cancer  
529 driver genes. *Sci Rep.* 2016;6 May:26483. doi:10.1038/srep26483.
- 530 33. Ramsahai E, Walkins K, Tripathi V, John M. The use of gene interaction networks to  
531 improve the identification of cancer driver genes. *PeerJ.* 2017;5:e2568.  
532 doi:10.7717/peerj.2568.
- 533 34. Chen Y, Hao J, Jiang W, He T, Zhang X, Jiang T, et al. Identifying potential cancer driver



- 534 genes by genomic data integration. *Sci Rep.* 2013;3:3538. doi:10.1038/srep03538.
- 535 35. Jeni LA, Cohn JF, De La Torre F. Facing Imbalanced Data--Recommendations for the Use  
536 of Performance Metrics. In: 2013 Humaine Association Conference on Affective Computing  
537 and Intelligent Interaction. 2013. p. 245–51. doi:10.1109/ACII.2013.47.
- 538 36. Ladanyi A, Mukherjee A, Kenny HA, Johnson A, Mitra AK, Sundaresan S, et al. Adipocyte-  
539 induced CD36 expression drives ovarian cancer progression and metastasis. *Oncogene.*  
540 2018.
- 541 37. Hale JS, Otvos B, Sinyuk M, Alvarado AG, Hitomi M, Stoltz K, et al. Cancer stem cell-  
542 specific scavenger receptor 36 drives glioblastoma progression. *Stem Cells.* 2014.
- 543 38. Pascual G, Avgustinova A, Mejetta S, Martín M, Castellanos A, Attolini CSO, et al.  
544 Targeting metastasis-initiating cells through the fatty acid receptor CD36. *Nature.* 2017.
- 545 39. Lawrence MS, Stojanov P, Mermel CH, Robinson JT, Garraway LA, Golub TR, et al.  
546 Discovery and saturation analysis of cancer genes across 21 tumour types. *Nature.*  
547 2014;505:495–501. doi:10.1038/nature12912.
- 548 40. Zhang Y, Zhang L, Li R, Chang DW, Ye Y, Minna JD, et al. Genetic variations in cancer-  
549 related significantly mutated genes and lung cancer susceptibility. *Ann Oncol.*  
550 2017;28:1625–30. doi:10.1093/annonc/mdx161.
- 551 41. Lin DC, Hao JJ, Nagata Y, Xu L, Shang L, Meng X, et al. Genomic and molecular  
552 characterization of esophageal squamous cell carcinoma. *Nat Genet.* 2014.
- 553 42. Otsuka R, Akutsu Y, Sakata H, Hanari N, Murakami K, Kano M, et al. ZNF750 Expression Is  
554 a Potential Prognostic Biomarker in Esophageal Squamous Cell Carcinoma. *Oncology.*  
555 2018;94:142–8. doi:10.1159/000484932.
- 556 43. Hazawa M, Lin DC, Handral H, Xu L, Chen Y, Jiang YY, et al. ZNF750 is a lineage-specific

557 tumour suppressor in squamous cell carcinoma. *Oncogene*. 2017;36:2243–54.

558 44. Forbes SA, Beare D, Boutselakis H, Bamford S, Bindal N, Tate J, et al. COSMIC: Somatic  
559 cancer genetics at high-resolution. *Nucleic Acids Res*. 2017;45:D777–83.

560 45. Adzhubei IA, Schmidt S, Peshkin L, Ramensky VE, Gerasimova A, Bork P, et al. A method  
561 and server for predicting damaging missense mutations. *Nature Methods*. 2010;7:248–9.

562 46. Pedregosa F, Varoquaux G. Scikit-learn: Machine learning in Python. 2011.  
563 doi:10.1007/s13398-014-0173-7.2.

564 47. Huang DW, Sherman BT, Lempicki RA. Systematic and integrative analysis of large gene  
565 lists using DAVID bioinformatics resources. *Nat Protoc*. 2009;4:44–57.

566 48. Huang DW, Sherman BT, Lempicki RA. Bioinformatics enrichment tools: Paths toward  
567 the comprehensive functional analysis of large gene lists. *Nucleic Acids Res*. 2009.

## 568 **FIGURE LEGENDS**

569 **Figure 1 Distribution of top features identified by the classifier for TSG and OG.** Training  
570 genes were used to study the differences between the distributions of features (kernel  
571 density) in TSG and OG. Kolmogorov-Smirnov statistic and the p-value is given for each  
572 feature. Higher value of KS statistic shows magnitude of difference of the two distributions.

573 **Figure 2 Fraction of genes predicted plotted against log transformed mutation**  
574 **rates.** Genes predicted by a given method were sorted based on their mutation rate and  
575 plotted against the fraction of genes predicted below the given mutation rate

576 **Figure 3 Methodology for identifying novel driver genes.** The figure presents an overview  
577 of the different steps involved in our study. Block A (light green frame) shows how our

578 classifier is built and is repeated 5 times. Block B (light blue frame) shows random iterations

579 for estimation of hyper-parameters and is repeated 10 times.

580

581

582

583 **TABLES**

584 **Table 1. Classification metrics for training and test set.** Numbers in bold indicate best  
 585 performances for each metric between TSG and OG. The metrics are standard, and are  
 586 defined as follows (T stands for True, F for false, P for positives and N for negatives):  
 587 Accuracy =  $(TP + TN)/(TP + FP + TN + FN)$ ; Precision =  $TP/(TP+FP)$ ; Recall =  $TP/(TP+FN)$ ; F1  
 588 score is the harmonic mean of Precision and Recall.

|              |     | Accuracy    | F1 score           | Precision          | Recall             |
|--------------|-----|-------------|--------------------|--------------------|--------------------|
| Training set | OG  | 0.86 ± 0.04 | 0.77 ± 0.07        | <b>0.93 ± 0.04</b> | 0.67 ± 0.09        |
|              | TSG |             | <b>0.90 ± 0.03</b> | 0.84 ± 0.04        | <b>0.97 ± 0.01</b> |
| Test set     | OG  | 0.76 ± 0.03 | 0.59 ± 0.10        | <b>0.79 ± 0.12</b> | 0.50 ± 0.19        |
|              | TSG |             | <b>0.83 ± 0.02</b> | 0.77 ± 0.07        | <b>0.91 ± 0.07</b> |

589

590

591

592 **Table 2. Classification metrics for training and test set using BalancedBagging.**

|              |     | Accuracy           | F1 score    | Precision   | Recall      |
|--------------|-----|--------------------|-------------|-------------|-------------|
| Training set | OG  | <b>0.93 ± 0.05</b> | 0.92 ± 0.06 | 0.86 ± 0.09 | 0.99 ± 0.01 |
|              | TSG |                    | 0.94 ± 0.04 | 1.00 ± 0.01 | 0.90 ± 0.07 |
| Test set     | OG  | <b>0.69 ± 0.06</b> | 0.64 ± 0.06 | 0.56 ± 0.07 | 0.75 ± 0.06 |
|              | TSG |                    | 0.73 ± 0.06 | 0.82 ± 0.04 | 0.65 ± 0.09 |

593 **Table 3. Hyper-parameters for each of the folds.** For each cross-validation fold, the most  
594 frequent hyper-parameter set is reported. The average accuracy and F1-scores across the  
595 different random seed iterations (10, 20, 40, 80, 160, 320) are given along with the standard  
596 deviation.

| CV fold | N estimator | Max features | Max depth | Criterion | Accuracy    | F1 score    |             |
|---------|-------------|--------------|-----------|-----------|-------------|-------------|-------------|
|         |             |              |           |           |             | OG          | TSG         |
| 1       | 6           | log2         | 2         | entropy   | 0.74 ± 0.02 | 0.55 ± 0.02 | 0.82 ± 0.02 |
| 2       | 5           | log2         | 2         | gini      | 0.76 ± 0.03 | 0.60 ± 0.06 | 0.83 ± 0.02 |
| 3       | 10          | log2         | 2         | gini      | 0.75 ± 0.03 | 0.60 ± 0.04 | 0.82 ± 0.03 |
| 4       | 5           | log2         | 4         | entropy   | 0.76 ± 0.01 | 0.52 ± 0.04 | 0.84 ± 0.01 |
| 5       | 20          | log2         | 4         | gini      | 0.79 ± 0.01 | 0.72 ± 0.02 | 0.84 ± 0.01 |

597

598

599

600 **Table 4. Kolmogorov-Smirnov statistic for mutation rate distribution of predicted genes**  
601 **when compared to training set genes.** KS statistic for the top 60 predicted genes when  
602 compared with 208 genes in the training set.

| Method    | KS statistic | p-value |
|-----------|--------------|---------|
| MutSigCV  | 0.774        | <<0.001 |
| Our model | 0.193        | 0.054   |

603 **Table 5. Driver genes predicted for each of the cancer types. The genes reported showed**  
 604 *consensus for >4 CV models. Genes in bold did not find similar consensus in the pan-cancer*  
 605 *predictions. Novel genes are underlined.*

| Primary Tissue         | Genes                                                                                                                                             |
|------------------------|---------------------------------------------------------------------------------------------------------------------------------------------------|
| Breast cancer          | TP53, <b>CBFB</b> , RUNX1, <b>CDH1</b> , GATA3, <b>PTEN</b> , TBX3                                                                                |
| Central nervous system | TP53, <b>HCN1</b>                                                                                                                                 |
| Endometrium            | <b>KRAS</b> , PIK3R1, <b>PTEN</b>                                                                                                                 |
| Hematopoietic          | TP53, B2M, <b>CCND3</b> , HLA-A                                                                                                                   |
| Kidney                 | PBRM1, <b>VHL</b> , TP53                                                                                                                          |
| Large intestine        | TP53, FBXW7, <b>FAM182A</b> , <b>SOX9</b> , <b>AHNAK2</b> ,<br>TCF7L2, <u>ENSG00000121031</u> , <b>FLT3LG</b> , <b>PMEPA1</b> ,<br><b>ZFP36L2</b> |
| Liver                  | TP53, <b>ALB</b> , <b>KRTAP19-1</b> , <b>APOB</b> , <b>CD200</b> , <b>CRYGD</b> ,<br><b>KRTAP24-1</b> , <b>OR6N2</b>                              |

606

607 **Table 6. Definitions of mutation categories and the ratio of mutation categories.**

|                                                                                                                        |
|------------------------------------------------------------------------------------------------------------------------|
| Compound mutations = missense + complex + inframe + nonstop – LoFI                                                     |
| Loss of Function (LOF) = nonsense + frameshift                                                                         |
| Damaging = HiFI + MiFI                                                                                                 |
| Benign = silent + LoFI                                                                                                 |
| $ratio(A/B)_g = \begin{cases} \frac{A_g}{B_g} & \text{if } B_g \neq 0 \\ 2 * \max(A) & \text{if } B_g = 0 \end{cases}$ |

608

609 **Table 7. The ratio-metric features used in this study for classification.**

|                                                           |                                                                                                                                                                                                                                                                                                                          |
|-----------------------------------------------------------|--------------------------------------------------------------------------------------------------------------------------------------------------------------------------------------------------------------------------------------------------------------------------------------------------------------------------|
| <b>Previously defined in the literature (18 features)</b> | Silent/kb, Total Missense, Total Splicing, Total LOF, Missense/kb, LOF/kb, LOF/Silent, Splicing/Silent, Missense/Silent, LOF/Benign, Splicing/Benign, Missense/Benign, average Polyphen2 score, LOF/Total, Missense/Total, Splicing/Total, LOF/Missense, Missense entropy                                                |
| <b>Defined in this paper (19 features)</b>                | HiFI/LoFI, HiFI/Benign, MiFI/kb, Nonstop/kb, Inframe/kb, Complex/kb, Compound/Benign, Compound/kb, Damaging/kb, Damaging/Benign, Damaging/LoFI, High Missense frequency, Frameshift entropy, High Frameshift frequency, Splicing entropy, High Splicing frequency, Nonsense entropy, High Nonsense frequency, Total MiFI |

610

611 **DECLARATIONS**

612 **Ethics approval and consent to participate**

613 Not applicable

614 **Consent for publication**

615 Not applicable

616 **Availability of data and materials**

617 Data for this analysis was downloaded from COSMIC (v79)

618 The processed data and codes are available in GitHub.

619 (<https://github.com/RamanLab/IdentifyTSGOG>)

620 **Competing interests**

621 The authors declare that they have no competing interests

622 **Funding**

623 This work was supported by Department of Biotechnology, Government of India (DBT)

624 (BT/PR16710/BID/7/680/2016), IIT Madras, Initiative for Biological Systems Engineering

625 (IBSE) and Robert Bosch Center for Data Science and Artificial Intelligence (RBC-DSAI).

626 **Authors' contributions**

627 MS, RR and KR conceived and designed the study. MS, RR, and KR were involved in the  
628 analysis and interpretation of data. MS, RR and KR drafted the manuscript. The study was  
629 supervised by RR and KR. All authors read and approved the final manuscript.

630 **Acknowledgements**

631 Not applicable

632 **ADDITIONAL FILE INFORMATION**

633 Additional file 1: Table S1.

634 List of features and their ranks for each of the models and the calculated average rank.  
635 (XLSX 10.8 kB)

636 Additional file 2: Figure S1.

637 Distribution of features across the two classes for all the other features not included in  
638 Figure 1. (PDF 1.39 MB)

639



# Distribution of features

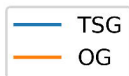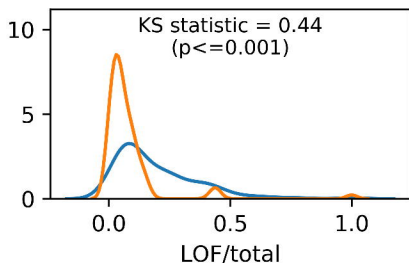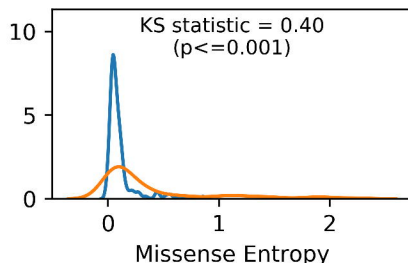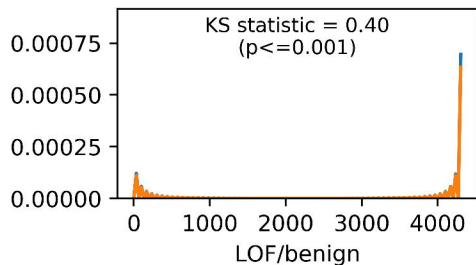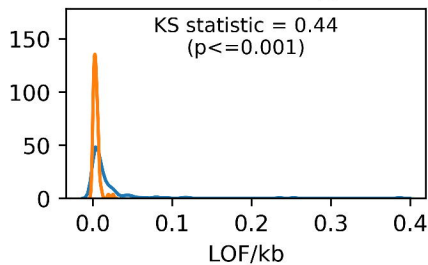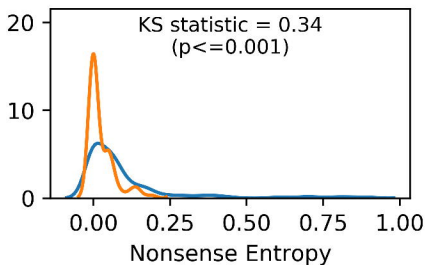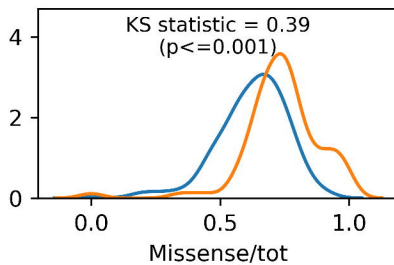

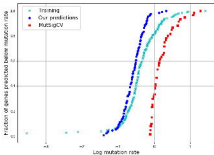

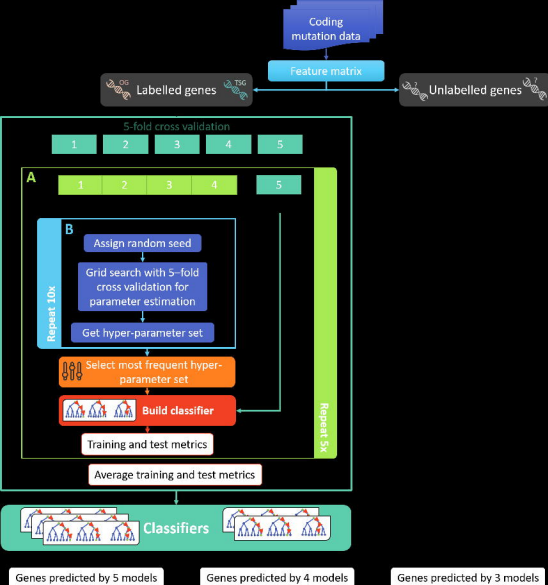

Source: https://biorxiv.org/content/biorxiv/early/2020/01/17/2020.01.17.910075.full-text.pdf
